# Supplementary material for: Spatial Modeling of Groundwater Level in Bangladesh Using Physio-Climatic Variables: Machine Learning and Statistical Approaches
Source: Research Square preprint supplement (doi:10.21203/rs.3.rs-2261689/v1), 2022-11-16
Supplement: Supplementary file 1 [file e519639419924aecef706256.docx]

**Spatial Modeling of Groundwater Level in Bangladesh Using**

**Physio-Climatic Variables: Machine Learning and Statistical Approaches**

A S M Maksud Kamal1*, Abul Kashem Faruki Fahim1 and Shamsuddin Shahid2

1Department of Disaster Science and Climate Resilience, University of Dhaka, Dhaka-1000, Bangladesh (email: [maksudkamal@du.ac.bd](mailto:maksudkamal@du.ac.bd); [fahim-4-2015117896@dsm.du.ac.bd](mailto:fahim-4-2015117896@dsm.du.ac.bd))

2Department of Water & Environmental Engineering, School of Civil Engineering, Faculty of Engineering, Universiti Teknologi Malaysia, Johor Bahru 81310, Malaysia (email: [sshahid@utm.my](mailto:sshahid@utm.my))

*Corresponding author. Email: [maksudkamal@du.ac.bd](mailto:maksudkamal@du.ac.bd)


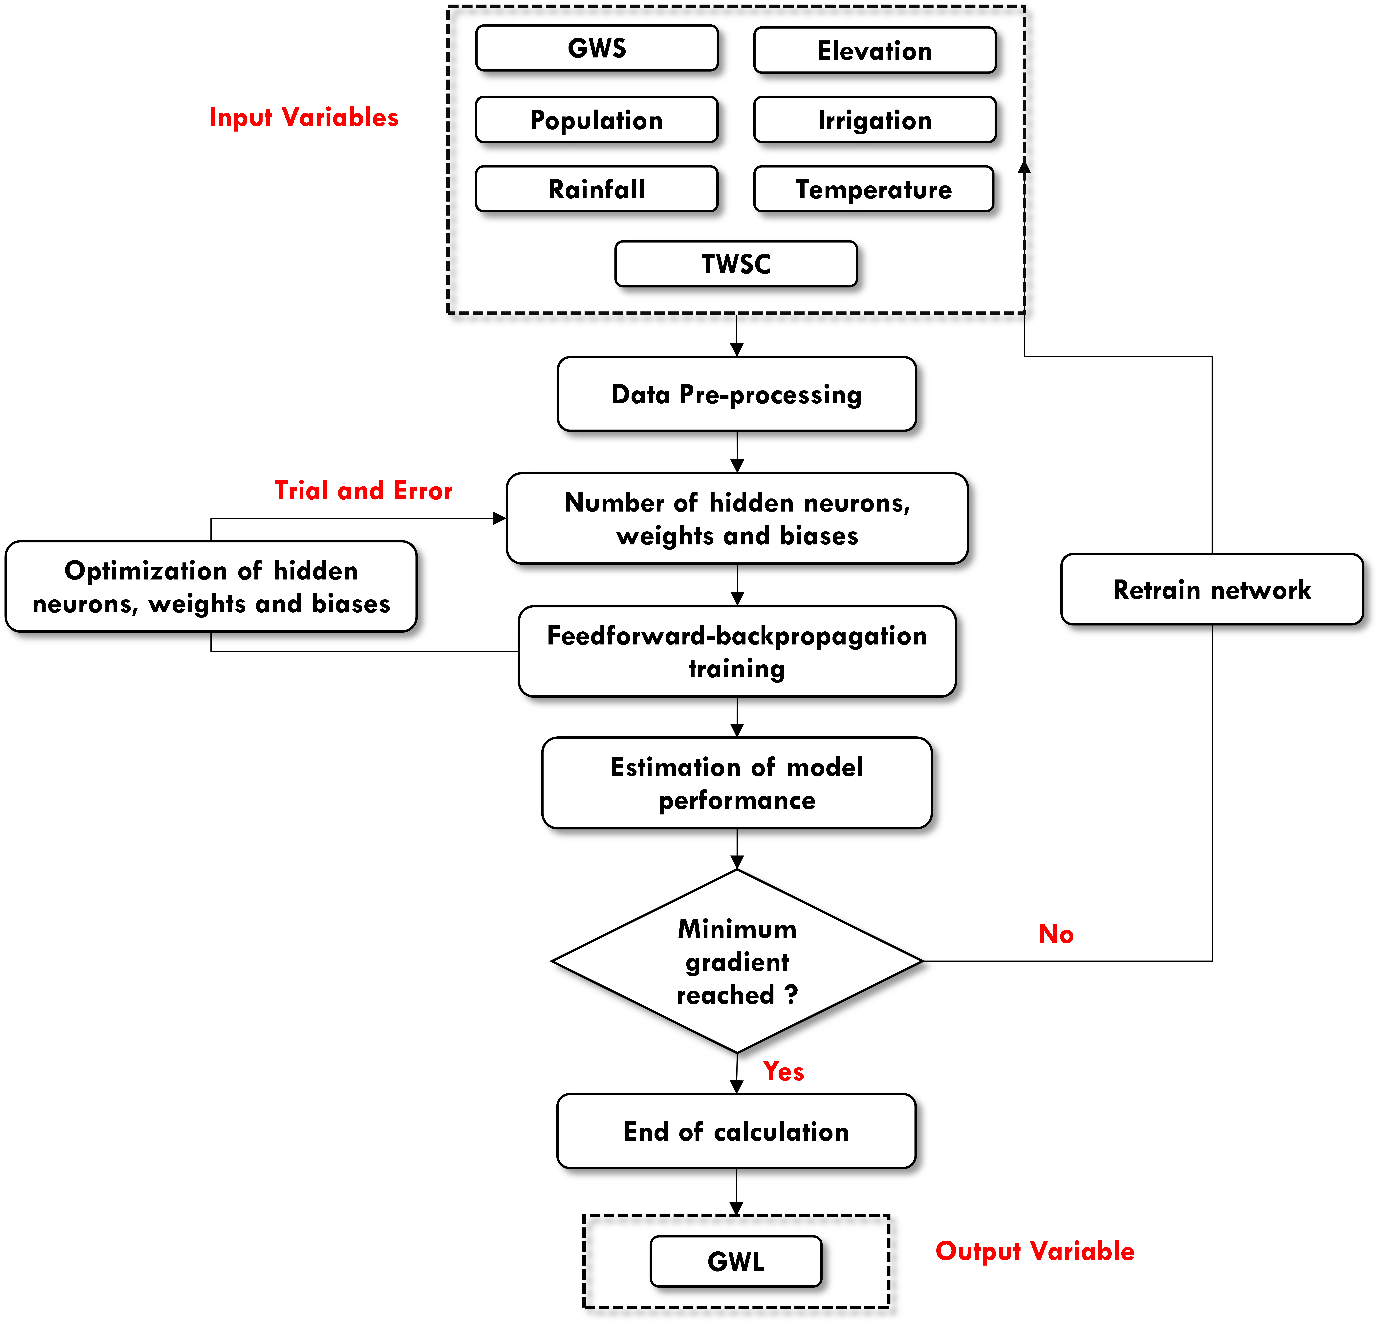


**Figure S1.** Flow of ANN model

**Figure S2.** Scatter plot showing the relationship between GWS (m) and GWL (m).


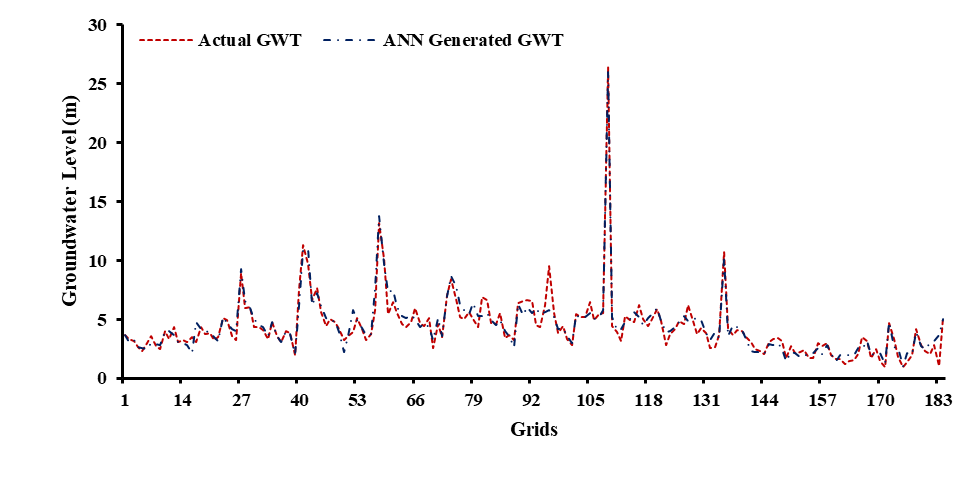


**GWL**

**GWL**

**Figure S3.** Observed and predicted GWL using the ANN model for all the grids


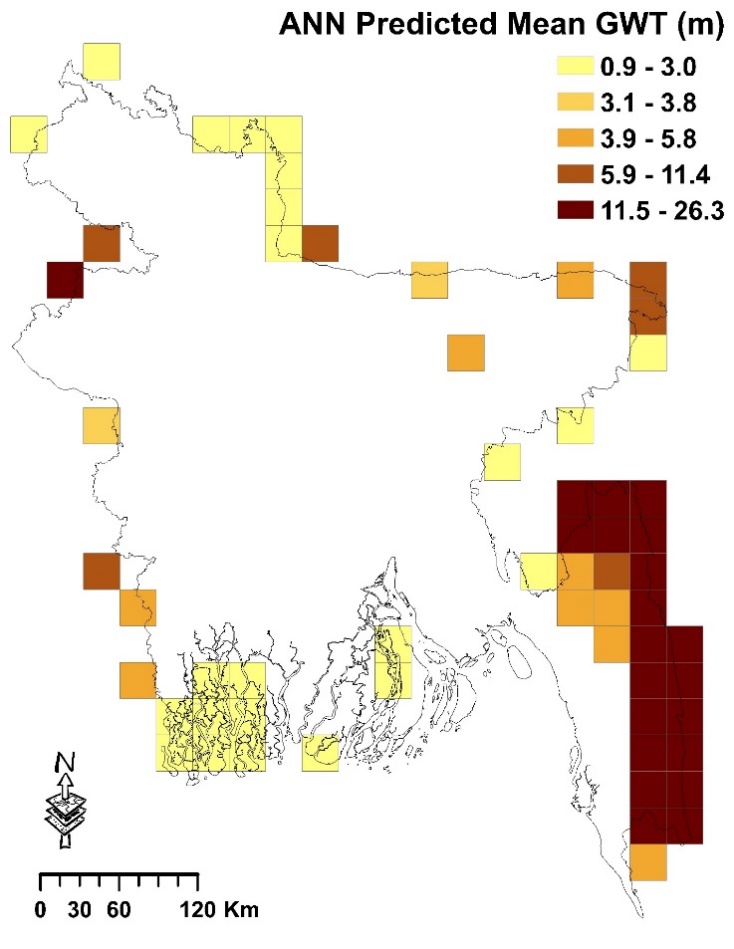


**.**

**GWL**

**Figure S4.** ANN model-predicted mean in the areas where no BWDB GWL observation wells are available.
